# Supplementary material for: Hyperoxia Provokes Time- and Dose-Dependent Gut Injury and Endotoxemia and Alters Gut Microbiome and Transcriptome in Mice
Source: Front Med (Lausanne). 2021 Nov 17;8:732039. doi: 10.3389/fmed.2021.732039 (PMC8635731; doi:10.3389/fmed.2021.732039)
Supplement: Supplementary Table 5 — KEGG enrichment analysis of gut injury induced by hyperoxia. [file Table_5.XLSX]

## Sheet: Additonal file5
Term	Database	ID	Input number	Background number	P-Value	Corrected P-Value	Rich Factor	Input
Metabolic pathways	KEGG PATHWAY	mmu01100	139	1494	1.83e-18	5.59e-16	0.0930388	Atic|Dctd|Art2a-ps|Acly|Eprs|Nme4|Rdh9|Hsd11b2|Gch1|Gucy1a1|Sptlc2|Cox6b2|Cad|Car15|Pank1|Pklr|Large2|Gcnt3|Plcb1|Ctps|Mars2|Rrm1|Rfk|Hsd17b2|Uqcrb|Hsd11b1|Adi1|Enpp4|Impdh2|Uap1l1|Gart|Mtap|Chka|Shmt1|Acot1|Pck2|Dhrs9|Dgat2|Pde7b|Smo|Fasn|Synj2|Prps2|Pcca|Rdh16|Paics|Gpld1|Fpgs|Tk1|Pycr2|Pycr1|Cps1|Adcy4|Treh|Adcy3|Mgam|Adcy9|Cs|Gpd2|Ldha|Pcyt1a|Pgm2l1|Tha1|Fhit|Lipg|Pla2g12b|Nt5e|Selenoi|Adsl|G…
Pathways in cancer	KEGG PATHWAY	mmu05200	63	535	7.52e-13	5.75e-11	0.117757	Il7r|Nos2|Il6ra|Fn1|Rac1|Ccnd1|Lama2|Msh2|Il15|Casp8|Hgf|Dll4|Lpar2|Notch3|Mapk8|Bcl2l1|Igf1r|Ptch1|Kit|Notch4|Max|Fos|Jun|Notch1|Cycs|Calml4|Fzd1|Col4a5|Ptgs2|Lamb1|Mmp2|Arnt2|Adcy4|Pmaip1|Adcy3|Mtr|Cdkn1a|Adcy9|Tcf7l2|Lamc3|Flt4|Agt|Pim1|Wnt2b|Plcb1|Pdgfra|Lama3|Lama4|Fzd6|Rasgrp4|Itga2b|Gadd45b|Egfr|Gadd45g|Gli2|Ptger4|Cdk4|Cdk6|Gadd45a|Lamc2|Vegfa|Lamc1|Itga2
Human papillomavirus infection	KEGG PATHWAY	mmu05165	49	361	2.96e-12	1.51e-10	0.135734	Fn1|Ccnd1|Mx2|Casp8|Notch1|Vegfa|Reln|Itgb6|Notch4|Slc9a3r1|Pard6b|Notch3|Creb3l3|Col4a5|Creb3l4|Lamb1|Cdk4|Hes2|Cdkn1a|Atp6v0c|Maml3|Itga9|Thbs4|Atm|Oasl2|Tcf7l2|Oasl1|Fzd1|Lfng|Col6a5|Wnt2b|Ptgs2|Lama2|Lama3|Lama4|Fzd6|Itga2b|Itga2|Tnfrsf1a|Egfr|Mpp5|Ptger4|Itga11|Isg15|Cdk6|Lamc2|Lamc3|Vwf|Lamc1
NOD-like receptor signaling pathway	KEGG PATHWAY	mmu04621	45	206	6.77e-18	1.04e-15	0.218447	Defa26|Il18|Casp4|Defa22|Defa23|Defa20|Defa21|Naip5|Defa24|Casp8|Defa29|Mefv|Defa3|Defa2|Gbp2b|Defa31|P2rx7|Bcl2l1|Irf7|Jun|Gabarap|Oas3|Oas2|Mapk13|Vdac2|Defa35|Defa34|Defa37|Defa36|Antxr1|Defa33|Defa32|Defa17|Gm15292|Gm14851|Mapk8|Dhx33|Trpm2|Plcb1|Gsdmd|Defa5|Gm7849|Nod1|Gm7861|Oas1g
PI3K-Akt signaling pathway	KEGG PATHWAY	mmu04151	44	358	6.47e-10	1.8e-08	0.122905	Pck2|Areg|Il6ra|Fn1|Rac1|Ccnd1|Hgf|Vegfa|Reln|Lpar2|Tek|Brca1|Igf1r|Sgk1|Itgb6|Kit|Creb3l3|Col4a5|Creb3l4|Lamb1|Cdkn1a|Il7r|Bcl2l1|Thbs4|Lama2|Lama3|Flt4|Col6a5|Itga9|Pdgfra|Myb|Lama4|Itga2b|Itga2|Efna4|Egfr|Efna1|Itga11|Cdk4|Cdk6|Lamc2|Lamc3|Vwf|Lamc1
MAPK signaling pathway	KEGG PATHWAY	mmu04010	32	294	1.52e-06	2.32e-05	0.108844	Areg|Rac1|Msh5|Cacna1g|Vegfa|Il1rap|Hgf|Dusp6|Pla2g4a|Igf1r|Stmn1|Rps6ka6|Tnfrsf1a|Max|Fos|Jun|Kit|Map2k6|Mapk13|Mapk8|Ddit3|Flt4|Pdgfra|Tek|Ptprr|Rasgrp4|Gadd45a|Gadd45b|Efna4|Egfr|Efna1|Gadd45g
Focal adhesion	KEGG PATHWAY	mmu04510	30	199	5.61e-09	1.32e-07	0.150754	Fn1|Rac1|Ccnd1|Tln2|Vegfa|Reln|Hgf|Mapk8|Igf1r|Itgb6|Vav3|Jun|Col4a5|Lamb1|Thbs4|Lama2|Flt4|Col6a5|Itga9|Pdgfra|Lama3|Lama4|Itga2b|Itga2|Egfr|Itga11|Lamc2|Lamc3|Vwf|Lamc1
Herpes simplex virus 1 infection	KEGG PATHWAY	mmu05168	30	439	0.00507398	0.0155264	0.0683371	Socs3|Casp8|Eif2b3|Zfp398|Zfp141|Zfp354a|Zfp316|Eif2ak4|Irf7|Hcfc1|Tnfrsf1a|Zfp607a|Cycs|Pilra|Oas3|Oas2|Zfp109|Cgas|Zfp72|Zfp39|Bcl2l1|Gm14391|Zfp37|Zfp94|Zfp275|Zfp568|Tapbp|Tnfrsf14|Zfp64|Oas1g
Rap1 signaling pathway	KEGG PATHWAY	mmu04015	29	214	8.03e-08	1.75e-06	0.135514	Rac1|Hgf|Vegfa|Lpar2|Kit|Igf1r|Vav3|Tln2|Pard6b|Calml4|Map2k6|Mapk13|Adcy4|Rap1gap|Adcy3|Adcy9|Tiam1|Flt4|Prkd3|Plcb1|Pdgfra|Tek|Itga2b|Efna4|Egfr|Efna1|Rapgef5|Rapgef3|Pkd1
Cell cycle	KEGG PATHWAY	mmu04110	29	123	9.46e-13	5.79e-11	0.235772	Ccnb1|Ccnd1|Orc2|Orc1|Mcm7|Mcm6|Mcm5|Mcm4|Mcm3|Mcm2|Cdc20|Chek1|Bub1b|Sfn|Bub1|Mad1l1|Cdkn1a|Atm|Prkdc|Cdc25c|Gadd45a|Gadd45b|Gadd45g|Ttk|Cdk1|Cdk4|Cdk6|Cdc45|Espl1
Human cytomegalovirus infection	KEGG PATHWAY	mmu05163	28	256	6.13e-06	6.47e-05	0.109375	Il6ra|Rac1|Ccnd1|Casp8|Vegfa|Cx3cl1|Tnfrsf1a|Ptger4|Adcy3|Cycs|Calml4|Creb3l3|Map2k6|Cgas|Mapk13|Adcy4|Nfatc4|Creb3l4|Ptgs2|Cdkn1a|Adcy9|Ccr5|Plcb1|Pdgfra|Egfr|Tapbp|Cdk4|Cdk6
Purine metabolism	KEGG PATHWAY	mmu00230	27	136	1.69e-10	5.18e-09	0.198529	Atic|Entpd1|Pgm2|Entpd8|Pde7b|Ada|Adprm|Nme4|Gucy1a1|Paics|Adcy4|Pklr|Prps2|Adcy3|Pnp2|Prps1l3|Adcy9|Nt5c3b|Rrm1|Gart|Fhit|Enpp4|Nt5e|Impdh2|Gda|Gucy1b1|Adsl
cAMP signaling pathway	KEGG PATHWAY	mmu04024	26	213	2.17e-06	2.77e-05	0.122066	Gcg|Rac1|Acox1|Vav3|Fos|Jun|Calml4|Creb3l3|Creb3l4|Pln|Adcy4|Adcy3|Adcy9|Tiam1|Htr4|Sox9|Abcc4|Mapk8|Ptch1|Lipe|Gria3|Gria4|Atp1b1|Vip|Grin3b|Rapgef3
Human T-cell leukemia virus 1 infection	KEGG PATHWAY	mmu05166	26	246	2.22e-05	0.000206311	0.105691	Fos|Ccnd1|Jun|Il15|Espl1|Nrp1|Chek1|Bcl2l1|Tnfrsf1a|Tln2|Creb3l3|Creb3l4|Mmp7|Ranbp1|Adcy4|Nfatc4|Adcy3|Mad1l1|Cdkn1a|Atm|Adcy9|Vdac2|Mapk8|Bub1b|Cdc20|Cdk4
Staphylococcus aureus infection	KEGG PATHWAY	mmu05150	25	96	5.46e-12	2.39e-10	0.260417	Defa26|Defa24|Defa22|Defa23|Defa20|Defa21|Defa29|Defa5|Defa3|Defa2|Defa35|Defa34|Defa37|Defa36|Defa31|Defa33|Defa32|Defa17|Gm15292|Gm14851|C3ar1|Cfd|Gm7849|Fcgr4|Gm7861
Small cell lung cancer	KEGG PATHWAY	mmu05222	24	92	1.4e-11	5.36e-10	0.26087	Nos2|Fn1|Ccnd1|Bcl2l1|Max|Cycs|Col4a5|Lamb1|Cdkn1a|Ptgs2|Lama2|Lama3|Lama4|Fhit|Itga2b|Gadd45b|Gadd45g|Cdk4|Cdk6|Gadd45a|Lamc2|Lamc3|Lamc1|Itga2
Proteoglycans in cancer	KEGG PATHWAY	mmu05205	24	206	1.07e-05	0.000105675	0.116505	Fn1|Rac1|Ccnd1|Gpc3|Vegfa|Hgf|Lum|Igf1r|Vav3|Hspg2|Hbegf|Mapk13|Mmp2|Cdkn1a|Tiam1|Ptch1|Wnt2b|Fzd1|Timp3|Fzd6|Cd44|Itga2|Egfr|Ezr
Epstein-Barr virus infection	KEGG PATHWAY	mmu05169	24	230	5.44e-05	0.000475299	0.104348	Entpd1|Rac1|Ccnd1|Casp8|Entpd8|Irf7|Jun|Cycs|Oas3|Oas2|Map2k6|Mapk13|Cdk4|Cdkn1a|Nedd4|Mapk8|Cd44|Gadd45b|Gadd45g|Tapbp|Isg15|Cdk6|Gadd45a|Oas1g
MicroRNAs in cancer	KEGG PATHWAY	mmu05206	23	282	0.00183493	0.00693194	0.0815603	Pim1|Ccnd1|Vegfa|Brca1|Stmn1|Notch4|Hmga2|Notch1|Kif23|Notch3|Atm|Cdkn1a|Dnmt1|Abcc1|Zeb2|Ptgs2|Pdgfra|Timp3|Cdc25c|Cd44|Egfr|Ezr|Cdk6
Cytokine-cytokine receptor interaction	KEGG PATHWAY	mmu04060	23	296	0.00322622	0.0107307	0.0777027	Il18|Il6ra|Il15|Il1rap|Cx3cl1|Ccl11|Gdf9|Il1rl2|Tnfrsf1a|Lifr|Il7r|Ccl6|Ccl9|Il18r1|Ccr2|Cxcr6|Cxcl16|Bmp7|Il18rap|Tnfrsf14|Il33|Tnfrsf19|Ccr5
Neuroactive ligand-receptor interaction	KEGG PATHWAY	mmu04080	23	348	0.0180146	0.0420799	0.066092	Gcg|Ltb4r2|Lpar2|Adm|P2rx7|P2rx6|Ptger4|Ltb4r1|Cysltr1|Htr4|Adrb3|Agt|P2ry6|Gabra3|Gria3|Calcrl|C3ar1|Adra2a|Gria4|P2ry14|Vip|Grin3b|Hrh1
ECM-receptor interaction	KEGG PATHWAY	mmu04512	22	86	1.35e-10	4.6e-09	0.255814	Fn1|Reln|Itgb6|Hspg2|Col4a5|Lamb1|Thbs4|Frem2|Col6a5|Hmmr|Itga9|Lama2|Lama3|Lama4|Itga2b|Itga2|Itga11|Cd44|Lamc2|Lamc3|Vwf|Lamc1
Breast cancer	KEGG PATHWAY	mmu05224	22	147	6.5e-07	1.17e-05	0.14966	Fos|Ccnd1|Dll4|Notch3|Brca1|Igf1r|Notch4|Jun|Notch1|Kit|Cdkn1a|Tcf7l2|Flt4|Wnt2b|Fzd1|Fzd6|Gadd45a|Gadd45b|Egfr|Gadd45g|Cdk4|Cdk6
Wnt signaling pathway	KEGG PATHWAY	mmu04310	22	162	2.75e-06	3.37e-05	0.135802	Rspo3|Rspo1|Znrf3|Rac1|Ccnd1|Jun|Gpc4|Prickle1|Ruvbl1|Daam2|Dkk2|Mmp7|Lgr5|Sfrp1|Nfatc4|Fzd1|Tcf7l2|Bambi|Mapk8|Wnt2b|Plcb1|Fzd6
Kaposi sarcoma-associated herpesvirus infection	KEGG PATHWAY	mmu05167	22	217	0.00015913	0.00108208	0.101382	Rac1|Ccnd1|Casp8|Vegfa|Gabarap|Clec2h|Irf7|Tnfrsf1a|Fos|Jun|Cycs|Calml4|Map2k6|Mapk13|Nfatc4|Rcn1|Cdkn1a|Ccr5|Mapk8|Ptgs2|Cdk4|Cdk6
Ras signaling pathway	KEGG PATHWAY	mmu04014	22	233	0.000394794	0.00201345	0.0944206	Rac1|Vegfa|Hgf|Kit|Mapk8|Bcl2l1|Igf1r|Calml4|Pla2g2a|Tiam1|Pla2g2f|Flt4|Pla2g4a|Pdgfra|Tek|Rasgrp4|Pla2g12b|Efna4|Egfr|Efna1|Rapgef5|Rasa3
Calcium signaling pathway	KEGG PATHWAY	mmu04020	21	194	9.69e-05	0.000760246	0.108247	Adcy4|Plcb1|Pdgfra|Nos2|Adcy3|Ltb4r2|Itpkb|Egfr|Adcy9|Calml4|P2rx6|Orai2|Htr4|Adrb3|Hrh1|Gnal|Vdac2|Cacna1g|Pln|P2rx7|Cysltr1
FoxO signaling pathway	KEGG PATHWAY	mmu04068	20	132	1.74e-06	2.32e-05	0.151515	Pck2|Il7r|Ccnb1|Prmt1|Sgk1|Igf1r|Cdkn1a|Gadd45a|Plk3|Atm|Egfr|Plk4|Gadd45g|Ccnd1|Ccng2|Foxo6|Mapk13|Mapk8|Gabarap|Gadd45b
Human immunodeficiency virus 1 infection	KEGG PATHWAY	mmu05170	20	239	0.00267879	0.00926547	0.083682	Bcl2l1|Ccnb1|Nfatc4|Casp8|Rac1|Cdc25c|Ccr5|Atm|Jun|Tnfrsf1a|Cycs|Calml4|Tapbp|Cdk1|Map2k6|Cgas|Mapk13|Mapk8|Fos|Chek1
p53 signaling pathway	KEGG PATHWAY	mmu04115	19	71	1.28e-09	3.27e-08	0.267606	Bcl2l1|Ccnb1|Cd82|Pmaip1|Ccnd1|Gadd45a|Gadd45b|Atm|Cycs|Gadd45g|Sfn|Cdk1|Ccng2|Cdk4|Casp8|Cdk6|Steap3|Cdkn1a|Chek1
Ribosome biogenesis in eukaryotes	KEGG PATHWAY	mmu03008	19	116	1.12e-06	1.91e-05	0.163793	Mdn1|Rpp38|Utp4|Rpp40|Nop58|Heatr1|Sbds|Tcof1|Gtpbp4|Wdr43|Nhp2|Xrn2|Dkc1|Mphosph10|Nol6|Wdr75|Wdr36|Spata5|Fbl
Axon guidance	KEGG PATHWAY	mmu04360	19	180	0.000272802	0.00160534	0.105556	Bmp7|Ephb2|Epha4|Nfatc4|Sema5a|Ephb4|Rac1|Plxna2|Ephb3|Efna4|Sema3g|Efna1|Pard6b|Unc5a|Trpc1|Ntn1|Ptch1|Nrp1|Rhod
Transcriptional misregulation in cancer	KEGG PATHWAY	mmu05202	19	183	0.000329752	0.0018686	0.103825	Bcl2l1|Nfkbiz|Igf1r|Ddit3|Mycn|Max|Gadd45b|Atm|Hmga2|Gadd45g|Runx2|Nupr1|Maf|Hist1h3d|Gria3|Dusp6|Cdkn1a|Arnt2|Gadd45a
Regulation of actin cytoskeleton	KEGG PATHWAY	mmu04810	19	217	0.00212155	0.00772852	0.0875576	Myh10|Itga9|Pdgfra|Fn1|Itgb6|Itga2b|Vav3|Rac1|Egfr|Ezr|Tiam1|Diaph3|Itga11|Insrr|Lpar2|Itga2|Iqgap3|Itgae|Pip4k2b
DNA replication	KEGG PATHWAY	mmu03030	18	35	5.68e-13	5.75e-11	0.514286	Pola1|Dna2|Pold1|Fen1|Rfc4|Rpa1|Mcm5|Mcm7|Mcm6|Pole|Mcm4|Prim1|Mcm2|Prim2|Mcm3|Pold2|Rfc1|Lig1
Endocrine resistance	KEGG PATHWAY	mmu01522	18	93	2.52e-07	4.81e-06	0.193548	Adcy4|Igf1r|Hbegf|Notch1|Adcy3|Notch4|Egfr|Cdkn1a|Fos|Jun|Adcy9|Notch3|Ccnd1|Dll4|Mapk13|Cdk4|Mapk8|Mmp2
Pancreatic secretion	KEGG PATHWAY	mmu04972	18	105	1.2e-06	1.93e-05	0.171429	Adcy4|Plcb1|Pla2g2f|Pnliprp2|Adcy3|Pla2g12b|Rab3d|Rac1|Adcy9|Atp1b1|Clca3b|Kcnma1|Trpc1|Clca4b|Clca4a|Slc12a2|Kcnq1|Pla2g2a
Toxoplasmosis	KEGG PATHWAY	mmu05145	18	108	1.71e-06	2.32e-05	0.166667	Bcl2l1|Nos2|Lama3|Lamc2|Lama4|Tnfrsf1a|Lama2|Msh5|Cycs|Lamb1|Map2k6|Casp8|Mapk13|Ly96|Lamc3|Mapk8|Lamc1|Ccr5
Cushing syndrome	KEGG PATHWAY	mmu04934	18	159	0.000179482	0.0011442	0.113208	Adcy4|Plcb1|Creb3l4|Rasd1|Adcy3|Ccnd1|Cdkn1a|Egfr|Adcy9|Tcf7l2|Cacna1g|Creb3l3|Cdk4|Cdk6|Fzd1|Wnt2b|Agt|Fzd6
Hepatitis C	KEGG PATHWAY	mmu05160	18	160	0.000192603	0.00120278	0.1125	Irf7|Socs3|Tnfrsf1a|Ccnd1|Mx2|Cdkn1a|Egfr|Eif2ak4|Cycs|Oas3|Oas2|Cdk4|Oas1g|Cdk6|Casp8|Cldn4|Cldn5|Ifit1
Tight junction	KEGG PATHWAY	mmu04530	18	167	0.000310283	0.00179145	0.107784	Amotl1|Myh10|Synpo|Rac1|Ccnd1|Nedd4|Slc9a3r1|Jun|Pard6b|Ezr|Mpp4|Tiam1|Pop1|Cdk4|Mpp5|Mapk8|Cldn4|Cldn5
cGMP-PKG signaling pathway	KEGG PATHWAY	mmu04022	18	173	0.000456586	0.00225001	0.104046	Adcy4|Plcb1|Kcnma1|Gtf2i|Nfatc4|Adcy3|Prkg2|Adcy9|Calml4|Gucy1a1|Creb3l3|Adrb3|Gucy1b1|Creb3l4|Adra2a|Vdac2|Atp1b1|Pln
Viral carcinogenesis	KEGG PATHWAY	mmu05203	18	231	0.00826832	0.023001	0.0779221	Pmaip1|Creb3l4|Creb3l3|Ccnd1|Cdkn1a|Rac1|Jun|Casp8|Cdc20|Mad1l1|Cdk1|Cdk4|Ccr5|Cdk6|Irf7|Gtf2h4|Ranbp1|Chek1
Oxytocin signaling pathway	KEGG PATHWAY	mmu04921	17	154	0.000350186	0.0019032	0.11039	Adcy4|Plcb1|Nfatc4|Rcn1|Adcy3|Ccnd1|Egfr|Cdkn1a|Fos|Jun|Adcy9|Calml4|Gucy1a1|Gucy1b1|Ptgs2|Pla2g4a|Trpm2
RNA transport	KEGG PATHWAY	mmu03013	17	167	0.000810741	0.00344565	0.101796	Rpp38|Rpp40|Xpo5|Sgk2|Nup133|Nup107|Nup160|Prmt5|Ndc1|Nup43|Nup188|Elac2|Nup37|Nup155|Eif2b3|Gemin5|Nup210
Hepatocellular carcinoma	KEGG PATHWAY	mmu05225	17	171	0.00102979	0.00413912	0.0994152	Bcl2l1|Wnt2b|Igf1r|Smarcc1|Fzd6|Fzd1|Mtr|Gadd45a|Gadd45b|Egfr|Tcf7l2|Gadd45g|Ccnd1|Cdk4|Cdk6|Hgf|Cdkn1a
Cellular senescence	KEGG PATHWAY	mmu04218	17	186	0.00235198	0.00827247	0.0913978	Ccnb1|Nfatc4|Chek1|Gadd45a|Gadd45b|Atm|Calml4|Cdk1|Cdk4|Map2k6|Cdk6|Mapk13|Vdac2|Mybl2|Cdkn1a|Ccnd1|Gadd45g
Oocyte meiosis	KEGG PATHWAY	mmu04114	16	119	6.73e-05	0.000571904	0.134454	Adcy4|Ccnb1|Bub1|Rps6ka6|Adcy3|Mad1l1|Sgo1|Adcy9|Calml4|Igf1r|Cdk1|Espl1|Aurka|Mapk13|Cdc25c|Cdc20
Measles	KEGG PATHWAY	mmu05162	16	144	0.000483307	0.00227526	0.111111	Bcl2l1|Irf7|Fos|Ccnd1|Mx2|Jun|Msh5|Cycs|Eif2ak4|Oas3|Oas2|Cdk4|Casp8|Cdk6|Mapk8|Oas1g
Chemokine signaling pathway	KEGG PATHWAY	mmu04062	16	200	0.00989214	0.0260948	0.08	Adcy4|Plcb1|Ccl9|Ccl6|Rac1|Grk6|Vav3|Adcy3|Adcy9|Tiam1|Ccr2|Ccl11|Ccr5|Cx3cl1|Cxcl16|Cxcr6
Thermogenesis	KEGG PATHWAY	mmu04714	16	232	0.0316409	0.0645474	0.0689655	Adcy4|Smarcc1|Lipe|Rps6ka6|Gcg|Adcy3|Prkg2|Adcy9|Creb3l3|Adrb3|Creb3l4|Mapk13|Cox7a1|Cox6b2|Uqcrb|Plin1
Pyrimidine metabolism	KEGG PATHWAY	mmu00240	15	58	1.02e-07	2.07e-06	0.258621	Nme4|Ctps|Uck2|Ctps2|Entpd1|Pnp2|Dctd|Nt5e|Umps|Nt5c3b|Tyms|Rrm1|Tk1|Entpd8|Cda
Colorectal cancer	KEGG PATHWAY	mmu05210	15	88	9.66e-06	9.86e-05	0.170455	Areg|Msh2|Pmaip1|Rac1|Ccnd1|Jun|Gadd45b|Fos|Egfr|Cycs|Gadd45g|Tcf7l2|Gadd45a|Mapk8|Cdkn1a
Parathyroid hormone synthesis, secretion and action	KEGG PATHWAY	mmu04928	15	107	7.37e-05	0.00060962	0.140187	Adcy4|Plcb1|Mmp17|Adcy3|Slc9a3r1|Fos|Egfr|Adcy9|Hbegf|Runx2|Creb3l3|Slc34a2|Creb3l4|Mafb|Cdkn1a
TNF signaling pathway	KEGG PATHWAY	mmu04668	15	113	0.000127658	0.000952763	0.132743	Ptgs2|Socs3|Tnfrsf1a|Fos|Jun|Il18r1|Casp8|Il15|Creb3l3|Map2k6|Creb3l4|Mapk13|Cx3cl1|Mapk8|Bcl3
Relaxin signaling pathway	KEGG PATHWAY	mmu04926	15	131	0.000538871	0.00248034	0.114504	Adcy4|Plcb1|Nos2|Adcy3|Egfr|Fos|Jun|Adcy9|Creb3l3|Col4a5|Vegfa|Creb3l4|Mapk13|Mapk8|Mmp2
Estrogen signaling pathway	KEGG PATHWAY	mmu04915	15	134	0.000667316	0.0029594	0.11194	Adcy4|Plcb1|Hbegf|Adcy3|Egfr|Krt20|Fos|Jun|Adcy9|Msh5|Creb3l3|Krt12|Creb3l4|Calml4|Mmp2
Apoptosis	KEGG PATHWAY	mmu04210	15	136	0.00076669	0.00330432	0.110294	Bcl2l1|Ddit3|Pmaip1|Tnfrsf1a|Gadd45a|Gadd45b|Atm|Jun|Parp1|Cycs|Gadd45g|Lmnb1|Casp8|Mapk8|Fos
Vascular smooth muscle contraction	KEGG PATHWAY	mmu04270	15	140	0.00100345	0.00409407	0.107143	Adcy4|Plcb1|Adm|Adcy3|Pla2g12b|Calcrl|Adcy9|Calml4|Gucy1a1|Kcnma1|Gucy1b1|Pla2g2f|Pla2g4a|Agt|Pla2g2a
Adrenergic signaling in cardiomyocytes	KEGG PATHWAY	mmu04261	15	152	0.0021127	0.00772852	0.0986842	Adcy4|Plcb1|Rapgef3|Tnnt2|Adcy3|Kcnq1|Adcy9|Calml4|Creb3l3|Scn7a|Creb3l4|Atp1b1|Pln|Agt|Mapk13
Salivary secretion	KEGG PATHWAY	mmu04970	14	78	1.13e-05	0.000108472	0.179487	Adcy4|Plcb1|Kcnma1|Adcy3|Prkg2|Adcy9|Calml4|Gucy1a1|Lyz1|Adrb3|Gucy1b1|Slc12a2|Kcnn4|Atp1b1
AGE-RAGE signaling pathway in diabetic complications	KEGG PATHWAY	mmu04933	14	101	0.000140958	0.0010031	0.138614	Plcb1|Fn1|Rac1|Ccnd1|Pim1|Jun|Col4a5|Vegfa|Mapk13|Cdk4|Thbd|Agt|Mmp2|Mapk8
Aldosterone synthesis and secretion	KEGG PATHWAY	mmu04925	14	102	0.000154697	0.00107585	0.137255	Adcy4|Plcb1|Lipe|Adcy3|Dagla|Adcy9|Calml4|Creb3l3|Cacna1g|Creb3l4|Atp1b1|Agt|Pkd1|Prkd3
Platelet activation	KEGG PATHWAY	mmu04611	14	125	0.000989362	0.00409114	0.112	Adcy4|Plcb1|Adcy3|Itga2b|Itga2|Prkg2|Tln2|Adcy9|Vamp8|Gucy1a1|Gucy1b1|Mapk13|Pla2g4a|Vwf
Inflammatory mediator regulation of TRP channels	KEGG PATHWAY	mmu04750	14	127	0.00113707	0.00446083	0.110236	Adcy4|Plcb1|Adcy3|Ptger4|Cyp2c65|Mapk13|Adcy9|Calml4|Map2k6|Hrh1|Il1rap|Pla2g4a|Mapk8|Trpv3
Gastric cancer	KEGG PATHWAY	mmu05226	14	150	0.00461436	0.0146786	0.0933333	Wnt2b|Fzd1|Fzd6|Mtr|Muc2|Gadd45b|Egfr|Tcf7l2|Gadd45g|Ccnd1|Gadd45a|Hgf|Reg4|Cdkn1a
Non-alcoholic fatty liver disease (NAFLD)	KEGG PATHWAY	mmu04932	14	151	0.0048681	0.0152004	0.0927152	Pklr|Ddit3|Il6ra|Socs3|Rac1|Tnfrsf1a|Jun|Cycs|Casp8|Cox7a1|Cox6b2|Uqcrb|Mapk8|Adipoq
GnRH signaling pathway	KEGG PATHWAY	mmu04912	13	90	0.000167343	0.00108951	0.144444	Adcy4|Plcb1|Adcy3|Jun|Egfr|Adcy9|Calml4|Hbegf|Map2k6|Mapk13|Pla2g4a|Mmp2|Mapk8
Progesterone-mediated oocyte maturation	KEGG PATHWAY	mmu04914	13	90	0.000167343	0.00108951	0.144444	Adcy4|Ccnb1|Bub1|Rps6ka6|Adcy3|Mad1l1|Adcy9|Igf1r|Cdk1|Aurka|Mapk13|Cdc25c|Mapk8
Dilated cardiomyopathy (DCM)	KEGG PATHWAY	mmu05414	13	95	0.000269691	0.00160534	0.136842	Adcy4|Itga9|Tnnt2|Sgcd|Adcy3|Itga2b|Itga2|Itgb6|Adcy9|Itga11|Pln|Agt|Lama2
Circadian entrainment	KEGG PATHWAY	mmu04713	13	99	0.00038625	0.00201345	0.131313	Adcy4|Plcb1|Rasd1|Adcy3|Gria3|Fos|Adcy9|Gria4|Calml4|Gucy1a1|Gucy1b1|Prkg2|Cacna1g
Amoebiasis	KEGG PATHWAY	mmu05146	13	103	0.00054308	0.00248034	0.126214	Plcb1|Nos2|Lama3|Lamc2|Lama4|Fn1|Muc2|Lama2|Gnal|Col4a5|Lamb1|Lamc3|Lamc1
Hepatitis B	KEGG PATHWAY	mmu05161	13	163	0.0191914	0.0441548	0.0797546	Nfatc4|Casp8|Fos|Cdkn1a|Hspg2|Jun|Cycs|Creb3l3|Map2k6|Creb3l4|Mapk13|Irf7|Mapk8
Influenza A	KEGG PATHWAY	mmu05164	13	164	0.0200085	0.045691	0.0792683	Il18|Irf7|Socs3|Tnfrsf1a|Mx2|Cycs|Oas3|Oas2|Cdk4|Il33|Cdk6|Casp8|Oas1g
Tuberculosis	KEGG PATHWAY	mmu05152	13	178	0.0343575	0.0673935	0.0730337	Il18|Atp6v0c|Nos2|Tnfrsf1a|Plk3|Cycs|Calml4|Hspd1|Casp8|Mapk13|Irak2|Mapk8|Fcgr4
Fanconi anemia pathway	KEGG PATHWAY	mmu03460	12	51	4.43e-06	4.84e-05	0.235294	Brca1|Fanca|Palb2|Rpa1|Fan1|Fancb|Fancd2|Fancm|Fancl|Eme1|Pms2|Fanci
Pancreatic cancer	KEGG PATHWAY	mmu05212	12	75	0.00012577	0.000952763	0.16	Bcl2l1|Rac1|Ccnd1|Gadd45a|Gadd45b|Egfr|Gadd45g|Vegfa|Cdk6|Cdk4|Mapk8|Cdkn1a
Renin secretion	KEGG PATHWAY	mmu04924	12	76	0.00014058	0.0010031	0.157895	Plcb1|Ptger4|Prkg2|Kcnma1|Calml4|Clca3b|Adrb3|Clca4b|Clca4a|Gucy1a1|Agt|Gucy1b1
Gap junction	KEGG PATHWAY	mmu04540	12	86	0.000390957	0.00201345	0.139535	Adcy4|Plcb1|Pdgfra|Gja1|Adcy3|Tubb5|Egfr|Adcy9|Gucy1a1|Cdk1|Gucy1b1|Prkg2
PPAR signaling pathway	KEGG PATHWAY	mmu03320	12	87	0.000429509	0.00215459	0.137931	Pck2|Aqp7|Hmgcs2|Scd2|Acox1|Fabp4|Pltp|Slc27a4|Fads2|Apoa1|Adipoq|Plin1
Melanogenesis	KEGG PATHWAY	mmu04916	12	100	0.00130063	0.00503788	0.12	Adcy4|Plcb1|Fzd6|Adcy3|Adcy9|Tcf7l2|Calml4|Creb3l3|Creb3l4|Fzd1|Wnt2b|Kit
Viral protein interaction with cytokine and cytokine receptor	KEGG PATHWAY	mmu04061	12	103	0.00163488	0.00625341	0.116505	Il18|Ccl11|Ccl6|Il6ra|Il18rap|Tnfrsf1a|Ccl9|Ccr2|Il18r1|Tnfrsf14|Ccr5|Cx3cl1
Insulin resistance	KEGG PATHWAY	mmu04931	12	110	0.00269486	0.00926547	0.109091	Pck2|Rps6ka6|Socs3|Tnfrsf1a|Tbc1d4|Creb3l3|Creb3l4|Trib3|Slc27a4|Mapk8|Agt|Ppp1r3b
Carbon metabolism	KEGG PATHWAY	mmu01200	12	121	0.00542994	0.0164511	0.0991736	Pklr|Acox1|Prps2|Prps1l3|Pcca|Gapdh|Psat1|Gpd2|Cs|Hao2|Cps1|Shmt1
Yersinia infection	KEGG PATHWAY	mmu05135	12	123	0.00610662	0.0176285	0.097561	Il18|Rps6ka6|Fn1|Rac1|Vav3|Fos|Jun|Arhgef28|Mefv|Map2k6|Mapk13|Mapk8
AMPK signaling pathway	KEGG PATHWAY	mmu04152	12	126	0.00724484	0.0205271	0.0952381	Pck2|Igf1r|Lipe|Ccnd1|Pfkfb3|Pfkfb4|Scd2|Creb3l3|Fasn|Creb3l4|Acaca|Adipoq
Fluid shear stress and atherosclerosis	KEGG PATHWAY	mmu05418	12	143	0.0171542	0.0403784	0.0839161	Rac1|Itga2b|Tnfrsf1a|Jun|Calml4|Fos|Vegfa|Map2k6|Mapk13|Thbd|Mmp2|Mapk8
Fat digestion and absorption	KEGG PATHWAY	mmu04975	11	40	3.09e-06	3.63e-05	0.275	Pnliprp2|Apob|Abcg5|Pla2g12b|Clps|Dgat2|Npc1l1|Pla2g2a|Pla2g2f|Slc27a4|Apoa1
Homologous recombination	KEGG PATHWAY	mmu03440	11	41	3.78e-06	4.28e-05	0.268293	Brca1|Topbp1|Rad54b|Palb2|Atm|Rpa1|Pold1|Pold2|Rad51|Xrcc2|Eme1
Melanoma	KEGG PATHWAY	mmu05218	11	72	0.000339443	0.00188854	0.152778	Pdgfra|Ccnd1|Gadd45a|Gadd45b|Egfr|Igf1r|Gadd45g|Cdk4|Cdk6|Hgf|Cdkn1a
Glioma	KEGG PATHWAY	mmu05214	11	75	0.000463238	0.00225001	0.146667	Pdgfra|Ccnd1|Gadd45a|Gadd45b|Egfr|Igf1r|Calml4|Cdk4|Cdk6|Gadd45g|Cdkn1a
Biosynthesis of amino acids	KEGG PATHWAY	mmu01230	11	78	0.000622734	0.0028023	0.141026	Pklr|Tha1|Prps2|Prps1l3|Gapdh|Psat1|Cs|Pycr2|Pycr1|Cps1|Shmt1
Glycerophospholipid metabolism	KEGG PATHWAY	mmu00564	11	97	0.00303831	0.0103302	0.113402	Pcyt1a|Gpam|Pla2g12b|Gpat3|Selenoi|Pla2g2a|Mboat1|Phospho1|Pla2g2f|Pla2g4a|Adprm
HIF-1 signaling pathway	KEGG PATHWAY	mmu04066	11	114	0.00908105	0.0245912	0.0964912	Nos2|Tek|Il6ra|Igf1r|Cdkn1a|Egfr|Gapdh|Ldha|Tfrc|Vegfa|Pfkfb3
Glutamatergic synapse	KEGG PATHWAY	mmu04724	11	114	0.00908105	0.0245912	0.0964912	Adcy4|Plcb1|Slc38a1|Adcy3|Gria3|Adcy9|Gria4|Trpc1|Pla2g4a|Grin3b|Shank2
Thyroid hormone signaling pathway	KEGG PATHWAY	mmu04919	11	118	0.0113551	0.0290911	0.0932203	Plcb1|Rcn1|Notch4|Rcan2|Tbc1d4|Notch1|Atp1b1|Ccnd1|Dio1|Pln|Notch3
Osteoclast differentiation	KEGG PATHWAY	mmu04380	11	128	0.0189312	0.0438859	0.0859375	Fcgr4|Socs3|Rac1|Mapk13|Jun|Pirb|Map2k6|Fosl2|Mapk8|Tnfrsf1a|Fos
Apelin signaling pathway	KEGG PATHWAY	mmu04371	11	139	0.0310082	0.0636813	0.0791367	Adcy4|Plcb1|Nos2|Lipe|Adcy3|Ccnd1|Adcy9|Gabarap|Notch3|Calml4|Plin1
Phospholipase D signaling pathway	KEGG PATHWAY	mmu04072	11	149	0.0460292	0.084849	0.0738255	Adcy4|Plcb1|Pdgfra|Adcy3|Egfr|Adcy9|Kit|Rapgef3|Lpar2|Pla2g4a|Agt
Retrograde endocannabinoid signaling	KEGG PATHWAY	mmu04723	11	150	0.0477632	0.0875181	0.0733333	Adcy4|Plcb1|Ptgs2|Dagla|Gria3|Adcy3|Adcy9|Gria4|Mapk13|Mapk8|Gabra3
Regulation of lipolysis in adipocytes	KEGG PATHWAY	mmu04923	10	56	0.000206854	0.00126595	0.178571	Adcy4|Ptgs2|Lipe|Adcy3|Adcy9|Fabp4|Adrb3|Aqp7|Prkg2|Plin1
Basal cell carcinoma	KEGG PATHWAY	mmu05217	10	63	0.000477706	0.00227526	0.15873	Wnt2b|Fzd1|Fzd6|Gadd45a|Gadd45b|Tcf7l2|Gadd45g|Gli2|Ptch1|Cdkn1a
Insulin secretion	KEGG PATHWAY	mmu04911	10	86	0.00392124	0.0129021	0.116279	Adcy4|Plcb1|Gcg|Adcy3|Adcy9|Atp1b1|Creb3l3|Kcnn4|Creb3l4|Kcnma1
Toll-like receptor signaling pathway	KEGG PATHWAY	mmu04620	10	99	0.00949804	0.0254173	0.10101	Irf7|Tollip|Fos|Rac1|Jun|Casp8|Map2k6|Mapk13|Ly96|Mapk8
Autophagy - animal	KEGG PATHWAY	mmu04140	10	130	0.0447734	0.0840531	0.0769231	Bcl2l1|Vmp1|Deptor|Igf1r|Vamp8|Wipi1|Eif2ak4|Gabarap|Mapk8|Prap1
Mismatch repair	KEGG PATHWAY	mmu03430	9	22	1.71e-06	2.32e-05	0.409091	Rfc4|Msh2|Rpa1|Pold1|Pold2|Lig1|Pms2|Rfc1|Mlh3
Base excision repair	KEGG PATHWAY	mmu03410	9	35	3.83e-05	0.00034442	0.257143	Ung|Pold2|Parp1|Apex1|Pold1|Pole|Fen1|Lig1|Lig3
Cholesterol metabolism	KEGG PATHWAY	mmu04979	9	49	0.000354518	0.0019032	0.183673	Soat1|Apob|Abcg5|Lipg|Pltp|Vapa|Apoc2|Vdac2|Apoa1
Non-small cell lung cancer	KEGG PATHWAY	mmu05223	9	66	0.00233482	0.00827247	0.136364	Fhit|Ccnd1|Gadd45a|Cdkn1a|Egfr|Gadd45g|Cdk4|Cdk6|Gadd45b
Thyroid hormone synthesis	KEGG PATHWAY	mmu04918	9	73	0.00429193	0.0139716	0.123288	Adcy4|Plcb1|Creb3l4|Adcy3|Ttf2|Adcy9|Atp1b1|Creb3l3|Iyd
Gastric acid secretion	KEGG PATHWAY	mmu04971	9	74	0.00465302	0.0146786	0.121622	Adcy4|Plcb1|Kcnj10|Adcy3|Kcnq1|Adcy9|Ezr|Calml4|Atp1b1
Arrhythmogenic right ventricular cardiomyopathy (ARVC)	KEGG PATHWAY	mmu05412	9	77	0.00587924	0.0171338	0.116883	Itga9|Lama2|Itgb6|Itga2b|Itga2|Sgcd|Gja1|Tcf7l2|Itga11
Platinum drug resistance	KEGG PATHWAY	mmu01524	9	77	0.00587924	0.0171338	0.116883	Brca1|Bcl2l1|Pmaip1|Cdkn1a|Atm|Cycs|Casp8|Msh2|Top2a
Salmonella infection	KEGG PATHWAY	mmu05132	9	78	0.00633889	0.018128	0.115385	Il18|Nos2|Fos|Dync2h1|Rilp|Jun|Mapk13|Mapk8|Rac1
Th1 and Th2 cell differentiation	KEGG PATHWAY	mmu04658	9	87	0.0118178	0.0298863	0.103448	Maml3|Fos|Maf|Jun|Notch1|Notch3|Dll4|Mapk13|Mapk8
Protein digestion and absorption	KEGG PATHWAY	mmu04974	9	90	0.0142605	0.0349097	0.1	Kcne3|Col6a5|Slc36a1|Kcnq1|Col4a5|Kcnn4|Atp1b1|Dpp4|Col12a1
Hypertrophic cardiomyopathy (HCM)	KEGG PATHWAY	mmu05410	9	91	0.0151521	0.0367979	0.0989011	Itga9|Lama2|Tnnt2|Itgb6|Itga2b|Itga2|Sgcd|Itga11|Agt
Prostate cancer	KEGG PATHWAY	mmu05215	9	97	0.0213819	0.0477581	0.0927835	Pdgfra|Ccnd1|Cdkn1a|Egfr|Igf1r|Tcf7l2|Creb3l3|Insrr|Creb3l4
Choline metabolism in cancer	KEGG PATHWAY	mmu05231	9	99	0.0238168	0.0510227	0.0909091	Pcyt1a|Pdgfra|Rac1|Egfr|Fos|Jun|Slc22a4|Pla2g4a|Mapk8
Chagas disease (American trypanosomiasis)	KEGG PATHWAY	mmu05142	9	103	0.0292668	0.0609227	0.0873786	Plcb1|Nos2|Fos|Tnfrsf1a|Jun|Casp8|Mapk13|Gnal|Mapk8
Glucagon signaling pathway	KEGG PATHWAY	mmu04922	9	105	0.0322951	0.0650152	0.0857143	Pck2|Plcb1|Acaca|Gcg|Prmt1|Calml4|Creb3l3|Creb3l4|Ldha
C-type lectin receptor signaling pathway	KEGG PATHWAY	mmu04625	9	112	0.0445871	0.0840531	0.0803571	Ptgs2|Nfatc4|Plk3|Jun|Casp8|Calml4|Mapk13|Mapk8|Bcl3
Antifolate resistance	KEGG PATHWAY	mmu01523	8	30	8.3e-05	0.000668642	0.266667	Atic|Tyms|Fpgs|Abcc4|Gart|Abcc1|Shmt1|Slc46a1
Nucleotide excision repair	KEGG PATHWAY	mmu03420	8	43	0.000694218	0.00303472	0.186047	Rfc4|Rpa1|Pold2|Gtf2h4|Pold1|Pole|Lig1|Rfc1
Amphetamine addiction	KEGG PATHWAY	mmu05031	8	68	0.00885083	0.0243996	0.117647	Fos|Gria3|Jun|Gria4|Calml4|Creb3l3|Grin3b|Creb3l4
Cortisol synthesis and secretion	KEGG PATHWAY	mmu04927	8	69	0.00955224	0.0254173	0.115942	Adcy4|Plcb1|Adcy3|Adcy9|Cacna1g|Creb3l3|Creb3l4|Agt
Pertussis	KEGG PATHWAY	mmu05133	8	76	0.0156705	0.0371719	0.105263	Nos2|Fos|Jun|Calml4|Nod1|Mapk13|Ly96|Mapk8
Chronic myeloid leukemia	KEGG PATHWAY	mmu05220	8	76	0.0156705	0.0371719	0.105263	Bcl2l1|Ccnd1|Gadd45a|Gadd45b|Gadd45g|Cdk4|Cdk6|Cdkn1a
EGFR tyrosine kinase inhibitor resistance	KEGG PATHWAY	mmu01521	8	80	0.0202299	0.0458544	0.1	Bcl2l1|Pdgfra|Il6ra|Egfr|Igf1r|Vegfa|Hgf|Axl
Peroxisome	KEGG PATHWAY	mmu04146	8	84	0.02566	0.0541513	0.0952381	Pex11a|Pmp22|Dao|Acox1|Nos2|Eci3|Abcd1|Hao2
Drug metabolism - other enzymes	KEGG PATHWAY	mmu00983	8	87	0.0303464	0.0627431	0.091954	Nme4|Cda|Uck2|Impdh2|Rrm1|Tk1|Ces1c|Umps
Complement and coagulation cascades	KEGG PATHWAY	mmu04610	8	88	0.0320308	0.06491	0.0909091	Cd55|C3ar1|Cfd|Thbd|F13a1|Vwf|C7|C6
Arachidonic acid metabolism	KEGG PATHWAY	mmu00590	8	89	0.0337779	0.066684	0.0898876	Ptgs2|Ggt5|Cyp2c65|Pla2g12b|Pla2g2a|Pla2g2f|Pla2g4a|Cyp2u1
Steroid hormone biosynthesis	KEGG PATHWAY	mmu00140	8	89	0.0337779	0.066684	0.0898876	Cyp7b1|Cyp2c65|Sult2b1|Cyp2d22|Hsd17b2|Hsd11b2|Cyp2d26|Hsd11b1
Hematopoietic cell lineage	KEGG PATHWAY	mmu04640	8	95	0.0456219	0.0846079	0.0842105	Il7r|Il6ra|Cd55|Itga2b|Itga2|Kit|Tfrc|Cd44
Bladder cancer	KEGG PATHWAY	mmu05219	7	41	0.00229638	0.00826697	0.170732	Ccnd1|Cdkn1a|Egfr|Hbegf|Vegfa|Cdk4|Mmp2
Ether lipid metabolism	KEGG PATHWAY	mmu00565	7	47	0.00452519	0.0145759	0.148936	Pla2g12b|Enpp2|Pla2g2a|Selenoi|Pla2g2f|Pla2g4a|Tmem86b
ABC transporters	KEGG PATHWAY	mmu02010	7	48	0.00501609	0.0155043	0.145833	Abca14|Abcg5|Abcd1|Abca8a|Abcc4|Abcc1|Abca9
Notch signaling pathway	KEGG PATHWAY	mmu04330	7	49	0.00554594	0.0166378	0.142857	Dtx4|Maml3|Notch4|Notch1|Notch3|Dll4|Lfng
Ovarian steroidogenesis	KEGG PATHWAY	mmu04913	7	57	0.0114083	0.0290911	0.122807	Adcy4|Ptgs2|Igf1r|Adcy3|Adcy9|Hsd17b2|Pla2g4a
Legionellosis	KEGG PATHWAY	mmu05134	7	58	0.0123715	0.0307779	0.12069	Il18|Sec22b|Naip5|Msh5|Casp8|Hspd1|Cycs
Endometrial cancer	KEGG PATHWAY	mmu05213	7	58	0.0123715	0.0307779	0.12069	Ccnd1|Gadd45a|Gadd45b|Egfr|Tcf7l2|Gadd45g|Cdkn1a
Inflammatory bowel disease (IBD)	KEGG PATHWAY	mmu05321	7	59	0.0133919	0.0330478	0.118644	Il18|Il18rap|Jun|Il18r1|Rora|Maf|Ror2
Long-term depression	KEGG PATHWAY	mmu04730	7	61	0.0156112	0.0371719	0.114754	Plcb1|Igf1r|Gria3|Gucy1a1|Gucy1b1|Prkg2|Pla2g4a
Glycolysis / Gluconeogenesis	KEGG PATHWAY	mmu00010	7	67	0.0238143	0.0510227	0.104478	Pck2|Pklr|Aldh3b1|Gapdh|Pgm2|Ldha|Aldh1a3
Leishmaniasis	KEGG PATHWAY	mmu05140	7	67	0.0238143	0.0510227	0.104478	Marcksl1|Ptgs2|Nos2|Fos|Jun|Mapk13|Fcgr4
Bile secretion	KEGG PATHWAY	mmu04976	7	72	0.0325963	0.0651925	0.0972222	Adcy4|Aqp4|Abcg5|Adcy3|Adcy9|Atp1b1|Abcc4
Inositol phosphate metabolism	KEGG PATHWAY	mmu00562	7	73	0.0345804	0.0673987	0.0958904	Plcb1|Isyna1|Plch2|Impa2|Itpkb|Synj2|Pip4k2b
Vitamin digestion and absorption	KEGG PATHWAY	mmu04977	6	24	0.000868005	0.00363849	0.25	Slc52a3|Apob|Abcc1|Mmachc|Apoa1|Slc46a1
alpha-Linolenic acid metabolism	KEGG PATHWAY	mmu00592	6	25	0.00104154	0.00413912	0.24	Pla2g12b|Acox1|Pla2g2a|Pla2g2f|Pla2g4a|Fads2
Apoptosis - multiple species	KEGG PATHWAY	mmu04215	6	32	0.00310545	0.0104425	0.1875	Bcl2l1|Pmaip1|Tnfrsf1a|Casp8|Cycs|Mapk8
Thyroid cancer	KEGG PATHWAY	mmu05216	6	37	0.00582726	0.0171338	0.162162	Ccnd1|Gadd45a|Gadd45b|Tcf7l2|Gadd45g|Cdkn1a
Vasopressin-regulated water reabsorption	KEGG PATHWAY	mmu04962	6	43	0.0110045	0.0285372	0.139535	Aqp4|Adcy3|Adcy9|Creb3l3|Creb3l4|Dync2h1
Arginine and proline metabolism	KEGG PATHWAY	mmu00330	6	50	0.0203938	0.0458862	0.12	Nos2|Aldh4a1|Dao|Smo|Pycr2|Pycr1
Amyotrophic lateral sclerosis (ALS)	KEGG PATHWAY	mmu05014	6	52	0.0238439	0.0510227	0.115385	Bcl2l1|Tnfrsf1a|Rac1|Cycs|Map2k6|Mapk13
Cysteine and methionine metabolism	KEGG PATHWAY	mmu00270	6	52	0.0238439	0.0510227	0.115385	Adi1|Dnmt1|Psat1|Mtap|Ldha|Gm4737
Glycerolipid metabolism	KEGG PATHWAY	mmu00561	6	61	0.0441243	0.0840531	0.0983607	Gpam|Lipg|Dgat2|Gpat3|Mboat1|Pnliprp2
One carbon pool by folate	KEGG PATHWAY	mmu00670	5	19	0.00194352	0.00725266	0.263158	Tyms|Gart|Atic|Mthfd1|Shmt1
RNA polymerase	KEGG PATHWAY	mmu03020	5	30	0.0104697	0.0273824	0.166667	Polr1a|Polr1b|Polr1e|Polr3d|Polr2b
Aldosterone-regulated sodium reabsorption	KEGG PATHWAY	mmu04960	5	38	0.0241511	0.0513211	0.131579	Sfn|Nr3c2|Hsd11b2|Sgk1|Atp1b1
African trypanosomiasis	KEGG PATHWAY	mmu05143	5	39	0.02641	0.0553525	0.128205	Il18|Plcb1|Lama4|Apoa1|Thop1
Mineral absorption	KEGG PATHWAY	mmu04978	5	47	0.0493063	0.0882323	0.106383	Steap2|Slc46a1|Slc34a2|Slc39a4|Atp1b1
Nitrogen metabolism	KEGG PATHWAY	mmu00910	4	17	0.00777246	0.0218199	0.235294	Car3|Car8|Car15|Cps1
Circadian rhythm	KEGG PATHWAY	mmu04710	4	30	0.040669	0.0782686	0.133333	Nr1d1|Ror2|Rora|Npas2
Glyoxylate and dicarboxylate metabolism	KEGG PATHWAY	mmu00630	4	31	0.0445657	0.0840531	0.129032	Cs|Hao2|Pcca|Shmt1
Galactose metabolism	KEGG PATHWAY	mmu00052	4	32	0.0486637	0.0875947	0.125	B4galt1|Mgam|Gk|Pgm2
Biosynthesis of unsaturated fatty acids	KEGG PATHWAY	mmu01040	4	32	0.0486637	0.0875947	0.125	Acox1|Scd2|Fads2|Acot1
Pentose phosphate pathway	KEGG PATHWAY	mmu00030	4	32	0.0486637	0.0875947	0.125	Prps1l3|Prps2|Pgm2|Gpd2
Non-homologous end-joining	KEGG PATHWAY	mmu03450	3	13	0.021955	0.0486828	0.230769	Prkdc|Fen1|Xrcc6
Pantothenate and CoA biosynthesis	KEGG PATHWAY	mmu00770	3	18	0.0452511	0.084432	0.166667	Pank1|Vnn1|Ppat
Phosphonate and phosphinate metabolism	KEGG PATHWAY	mmu00440	2	6	0.0355891	0.0689257	0.333333	Pcyt1a|Selenoi
